# Supplementary material
Source: MDPI journal article supplement (https://www.mdpi.com/2313-4321/6/4/70)
Supplement: s1 [file s1 › recycling-1409958-supplementary.pdf]

Article

# Recycling of WEEE Plastics Waste in Mortar: The Effects on Mechanical Properties

Alessandra Merlo<sup>1</sup>, Luca Lavagna<sup>1,3\*</sup>, Daniel Suarez-Riera<sup>2</sup> and Matteo Pavese<sup>1,3</sup>

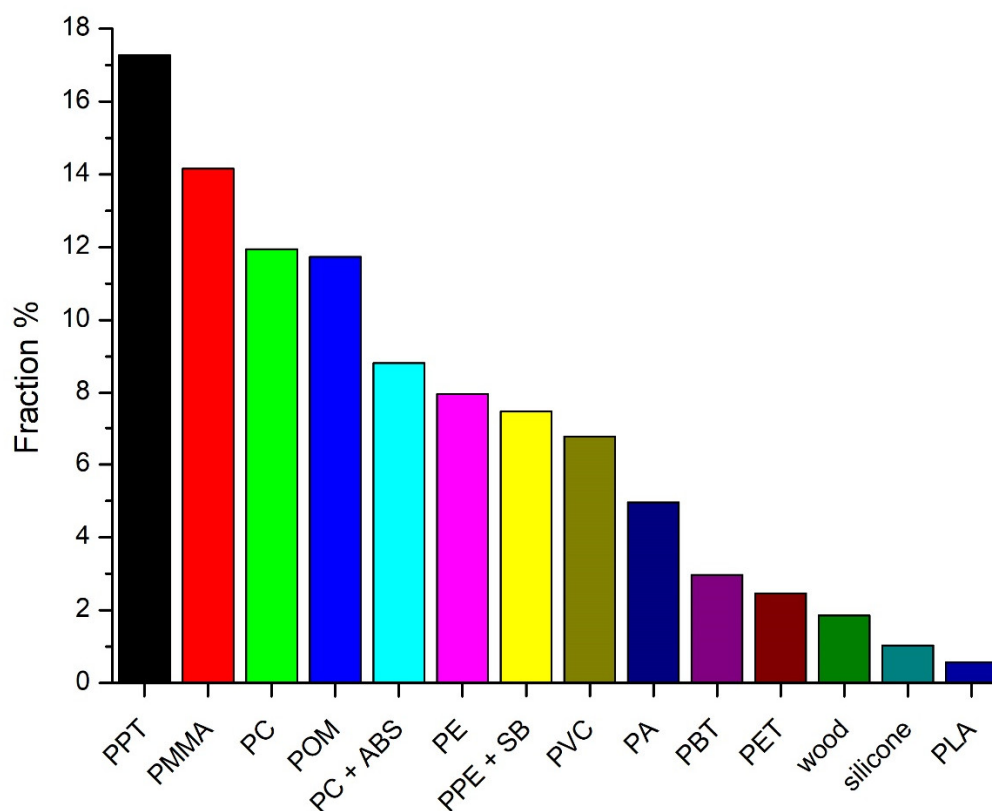

Figure 1 SI. percentage composition of the polymer mix

**Citation:** Merlo, A.; Lavagna, L.; Suarez-Riera, D. and Pavese M. Recycling of WEEE plastics waste in mortar: effect on mechanical properties. *Recycling* **2021**, *6*, x. <https://doi.org/10.3390/xxxxx>

Academic Editor: Firstname  
Lastname

Received: date

Accepted: date

Published: date

**Publisher's Note:** MDPI stays neutral with regard to jurisdictional claims in published maps and institutional affiliations.

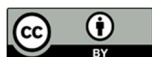

**Copyright:** © 2021 by the authors. Submitted for possible open access publication under the terms and conditions of the Creative Commons Attribution (CC BY) license (<https://creativecommons.org/licenses/by/4.0/>).
